# Supplementary material for: In Vitro Analysis of Matched Isolates from Localized and Disseminated Gonococcal Infections Suggests That Opa Expression Impacts Clinical Outcome
Source: MDPI journal article supplement (doi:10.3390/pathogens11020217), 2022-02-07
Supplement: s1 [file s1]

Table S1: MLST allele of transmigration related genes in clinical isolated *Neisseria gonorrhoeae* from different anatomical locations of the patients

| Patient            | 21           |              | 23           |              | 29           |              | 61           |               | 63           |              |
|--------------------|--------------|--------------|--------------|--------------|--------------|--------------|--------------|---------------|--------------|--------------|
| Locus              | Blood        | Cervix       | Blood        | Cervix       | Blood        | Urethra      | Blood        | Cervix        | Blood        | Cervix       |
| NEIS2020<br>(PorB) | 582<br>(PIA) | 582<br>(PIA) | 957<br>(PIA) | 957<br>(PIA) | 957<br>(PIA) | 957<br>(PIA) | 957<br>(PIA) | 1620<br>(PIB) | 582<br>(PIA) | 582<br>(PIA) |
| NEIS2109<br>(nhba) | 89           | 89           | 679          | 679          | 73           | 73           | 73           | 89            | 653          | 653          |
| NEIS0210<br>(pilE) | 1858         | 1866         | 474          | 1895         | 1895         | 1897         | 1843         | 550           | 935          | 935          |

\*Allele numbers are generated from PubMLST.org
